# Supplementary material for: A selective fluorescence turn-on sensing system for evaluation of Cu2+ polluted water based on ultra-fast formation of fluorescent copper nanoclusters
Source: Royal Society of Chemistry journal article supplement (doi:10.1039/c5ay00219b), 2015-01-01
Supplement: c5ay00219b1.pdf [file c5ay00219b1.pdf]

## Supporting information

Dan Li, Biao Li, Sung Ik Yang\*

Department of Applied Chemistry, College of Applied Science, Kyung Hee University, Yongin, 446-701 Korea.

\*Corresponding author. Tel.: +82-31- 201-3735

E-mail: [siyang@khu.ac.kr](mailto:siyang@khu.ac.kr)

Table S1 CuNCs-based fluorescence sensors

| Capping ligand | EX/EM (nm) | Formation time | Temperature | Sensing                          | Reference  |
|----------------|------------|----------------|-------------|----------------------------------|------------|
| BSA            | 325/410    | 6-8 h          | 55 °C       | Pb <sup>2+</sup> quenched sensor | 1          |
| BSA            | 330/407    | 8 h            | 55 °C       | kojic acid quenched sensor       | 2          |
| Trypsin        | 363/455    | 12 h           | 100 °C      | pH sensor                        | 3          |
| DNA            | 344/593    | 15 min         | Room        | Mismatch type in a DNA           | 4          |
| Tannic acid    | 360/430    | 6 h            | 50 °C       | Fe <sup>3+</sup> quenched sensor | 5          |
| BSA            | 524/625    | 4 h            | Room        | pH sensor                        | 6          |
| DPA            | 391/673    | About 1 minute | Room        | Cu <sup>2+</sup> turn-on sensor  | Our method |

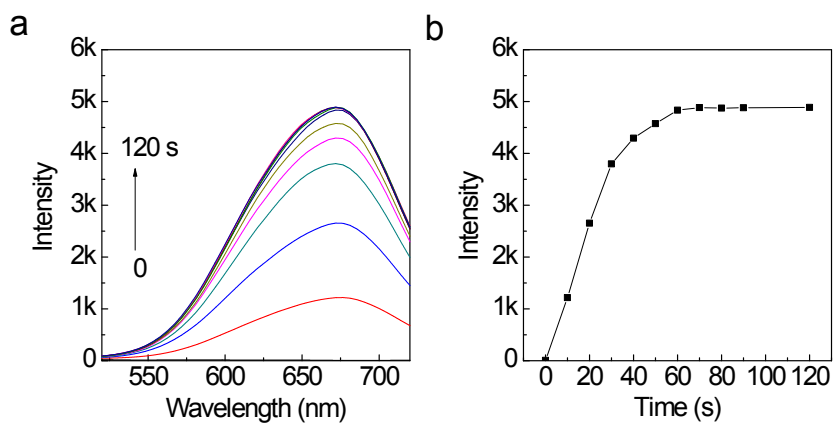

Fig. S1 Fluorescence emission spectra (a) and intensity (b) at 673 nm change as function of time.

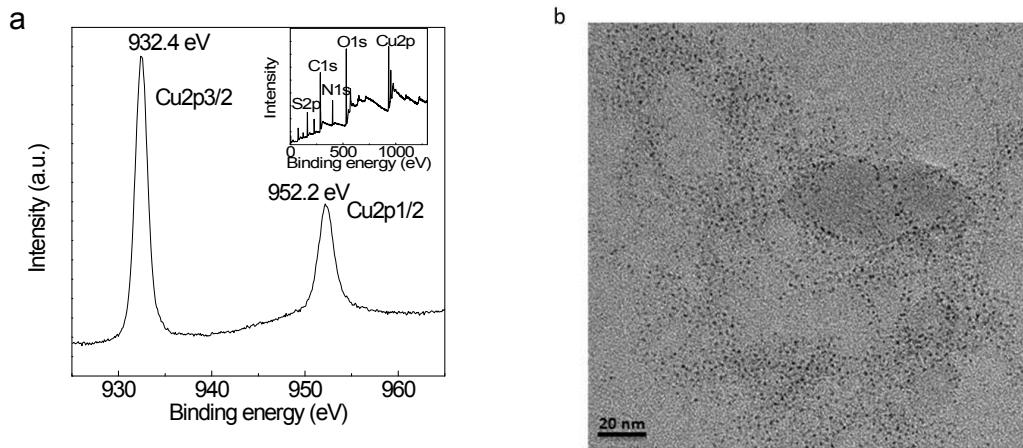

Fig. S2 XPS study (The inset shows XPS survey of the CuNCs-product) (a) and TEM image (b) of the as-prepared CuNCs.

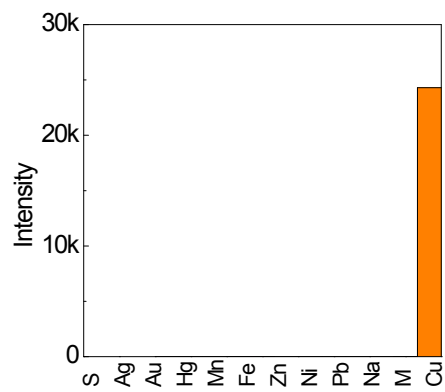

Fig. S3 Selectivity of the sensing system to  $\text{Cu}^{2+}$  over other metal ions. S indicates the noise signal. M indicates the mixture of other metal ions.

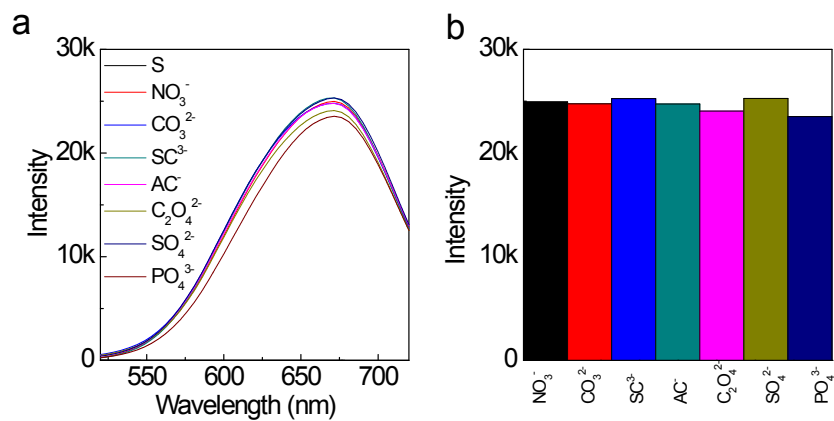

Fig. S4 Fluorescence emission spectra (a) and the fluorescence intensity at 673 nm (b) of the sensing system for  $\text{Cu}^{2+}$  in the presence of various anions.

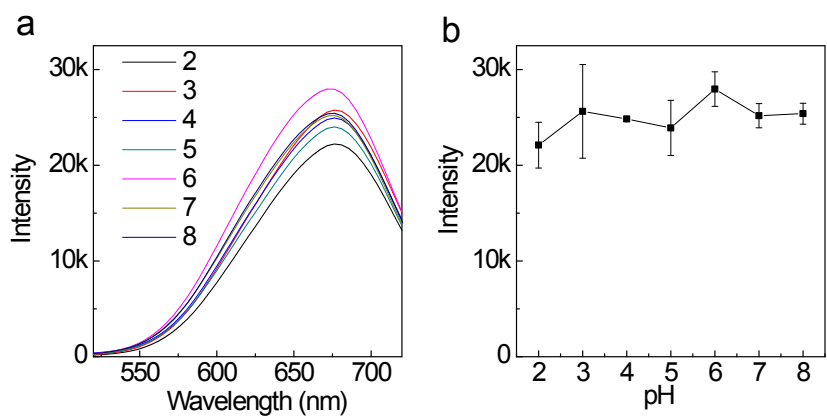

Fig. S5 Fluorescence emission spectra of the sensing system in the presence of 10 ppm of  $\text{Cu}^{2+}$  at different pH values (a) and the emission intensity at 673 nm as a function of pH (b).

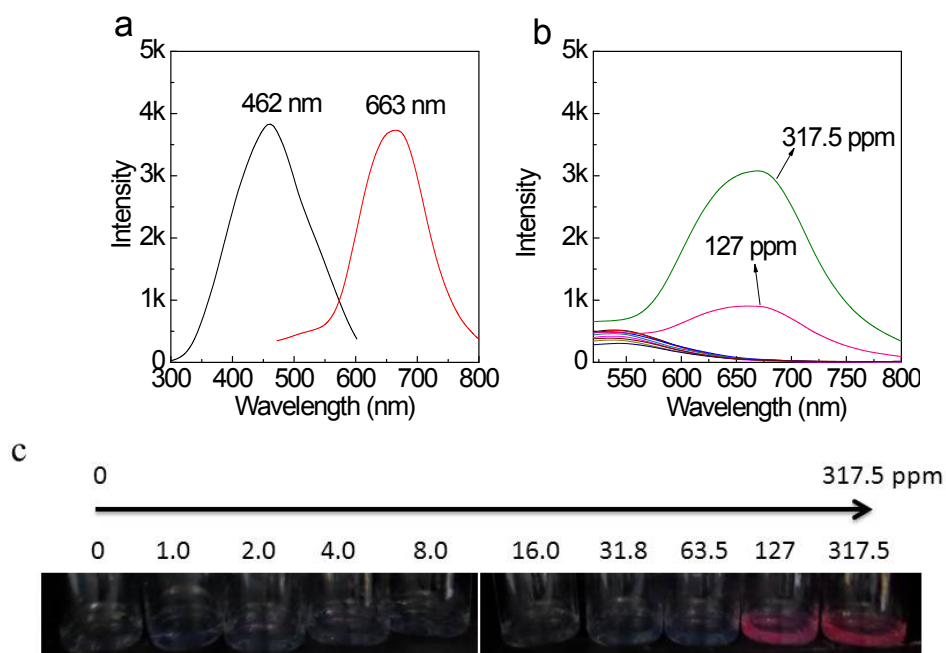

Fig. S6 Typically optimum fluorescence excitation (left), emission (right) spectra of BSA-CuNCs (a); the fluorescence spectra of the as formed products by the same synthesis method with different concentration of Cu<sup>2+</sup>, b; The photograph of the corresponding sensing products with different concentration of Cu<sup>2+</sup> under a 365 nm UV lamp (c).

Table S2 Detection of Cu<sup>2+</sup> in the presence other metal ions

| Add (ppm) | Found (ppm)         | Average (ppm) | Recovery (%) |
|-----------|---------------------|---------------|--------------|
| 1         | 0.87, 0.94, 1.05    | 0.956±0.117   | 95.6±11.7    |
| 5         | 4.65, 4.97, 5.11    | 4.88±0.29     | 97.6±5.7     |
| 10        | 10.29, 10.64, 10.09 | 10.34±0.28    | 103.4±2.8    |

Note: Other metal ions are including Ag<sup>+</sup>, Au<sup>3+</sup>, Hg<sup>2+</sup>, Mn<sup>2+</sup>, Fe<sup>3+</sup>, Zn<sup>2+</sup>, Ni<sup>2+</sup>, Pb<sup>2+</sup>, Na<sup>+</sup>

## References

- 1 N. Goswami; A. Giri; M.S. Bootharaju; P.L. Xavier; T. Pradeep, S.K. Pal. *Anal Chem*, 2011, **83**, 9676-9680.
- 2 Z. Gao; R.X. Su; W. Qi; L.B. Wang; Z.M. He. *Sensor Actuat B-Chem*, 2014, **195**, 359-364.
- 3 W. Wang; F. Leng; L. Zhan; Y. Chang; X.X. Yang; J. Lan; C.Z. Huang. *Analyst*, 2014, **139**, 2990-2993.
- 4 X. Jia; J. Li; L. Han; J. Ren; X. Yang; E. Wang. *Acs Nano*, 2012, **6**, 3311-3317.
- 5 H. Cao; Z. Chen; H. Zheng; Y. Huang. *Biosens Bioelectron*, 2014, **62C**, 189-195.
- 6 Chen, C.; Wang, R. Y.; Guo, L. Q.; Fu, N. Y.; Dong, H. J.; Yuan, Y. F. *Org Lett*, 2011, **13**, (5), 1162-1165.
